# Supplementary material for: Giant tunneling magnetoresistance in two-dimensional magnetic tunnel junctions based on double transition metal MXene ScCr2C2F2
Source: Royal Society of Chemistry journal article supplement (doi:10.1039/d2na00623e), 2022-01-01
Supplement: d2na00623e1.pdf [file d2na00623e1.pdf]

Supporting Information for

**Giant tunneling magnetoresistance in two-dimensional magnetic tunnel  
junctions based on double transition metal MXene  $\text{ScCr}_2\text{C}_2\text{F}_2$**

Zhou Cui<sup>1</sup>, Yinggan Zhang<sup>2,\*</sup>, Rui Xiong<sup>1</sup>, Cuilian Wen<sup>1</sup>, Jian Zhou<sup>3</sup>, Qingshui Xie<sup>2</sup>, Baisheng  
Sa<sup>1,\*\*</sup>, Zhimei Sun<sup>3,\*\*\*</sup>

<sup>1</sup>*Key Laboratory of Eco-materials Advanced Technology, College of Materials Science and  
Engineering, Fuzhou University, Fuzhou 350108, P. R. China*

<sup>2</sup>*College of Materials, Fujian Provincial Key Laboratory of Theoretical and Computational  
Chemistry, Xiamen University, Xiamen 361005, P. R. China*

<sup>3</sup>*School of Materials Science and Engineering, and Center for Integrated Computational Materials  
Science, International Research Institute for Multidisciplinary Science, Beihang University, Beijing  
100191, P. R. China*

**Corresponding Author:** ygzhang@xmu.edu.cn (Y. Zhang); bssa@fzu.edu.cn (B. Sa);  
zmsun@buaa.edu.cn (Z. Sun).

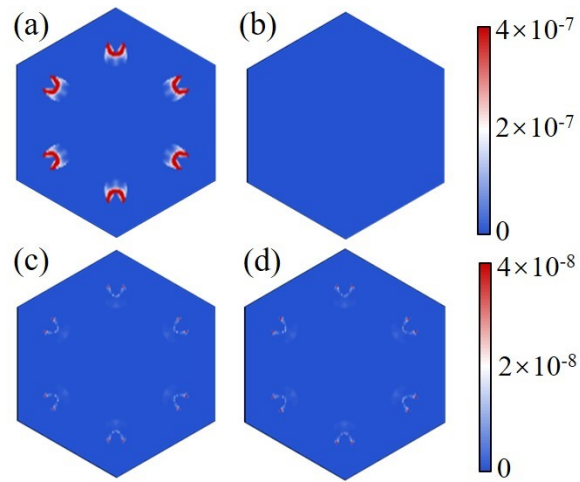

**Fig. S1** The spin-dependent  $k_{\parallel}$ -resolved transmission spectrums of MTJ-HM at the Fermi level for (a) spin-up and (b) spin-down channel in PC state, (c) spin-up and (d) spin-down channel in APC state.

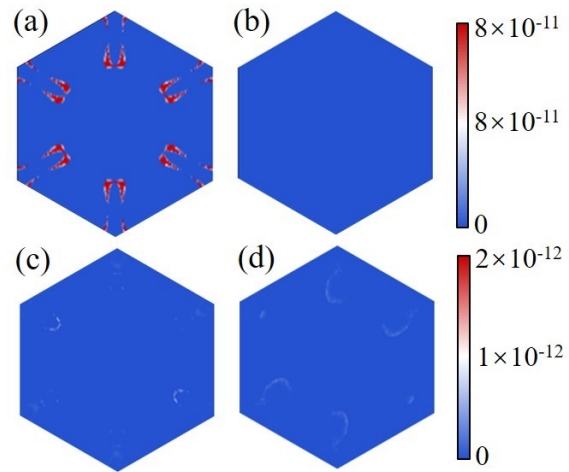

**Fig. S2** The spin-dependent  $k_{\parallel}$ -resolved transmission spectrums of MTJ-5HM at the Fermi level for (a) spin-up and (b) spin-down channel in PC state, (c) spin-up and (d) spin-down channel in APC state.

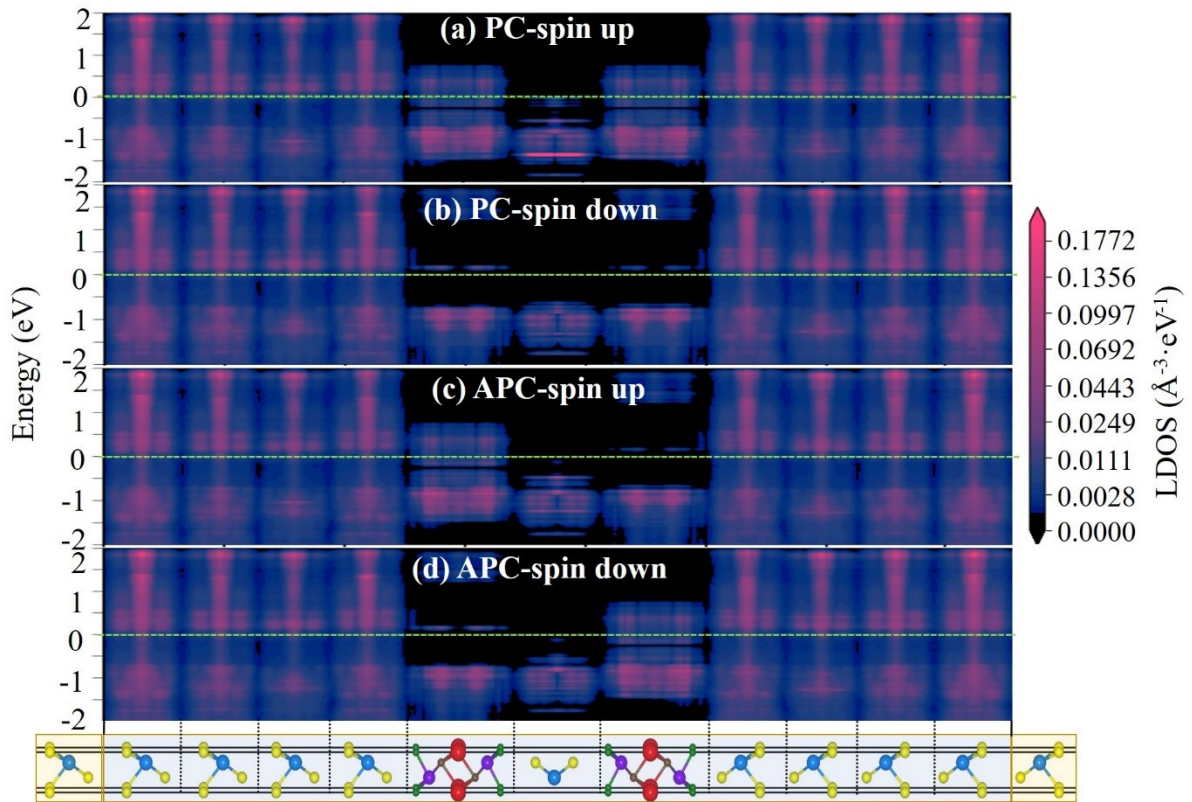

**Fig. S3** The spin-dependent projected local density of states of MTJ-HM for (a) spin-up and (b) spin-down channel in PC state, (c) spin-up and (d) spin-down channel in APC state.

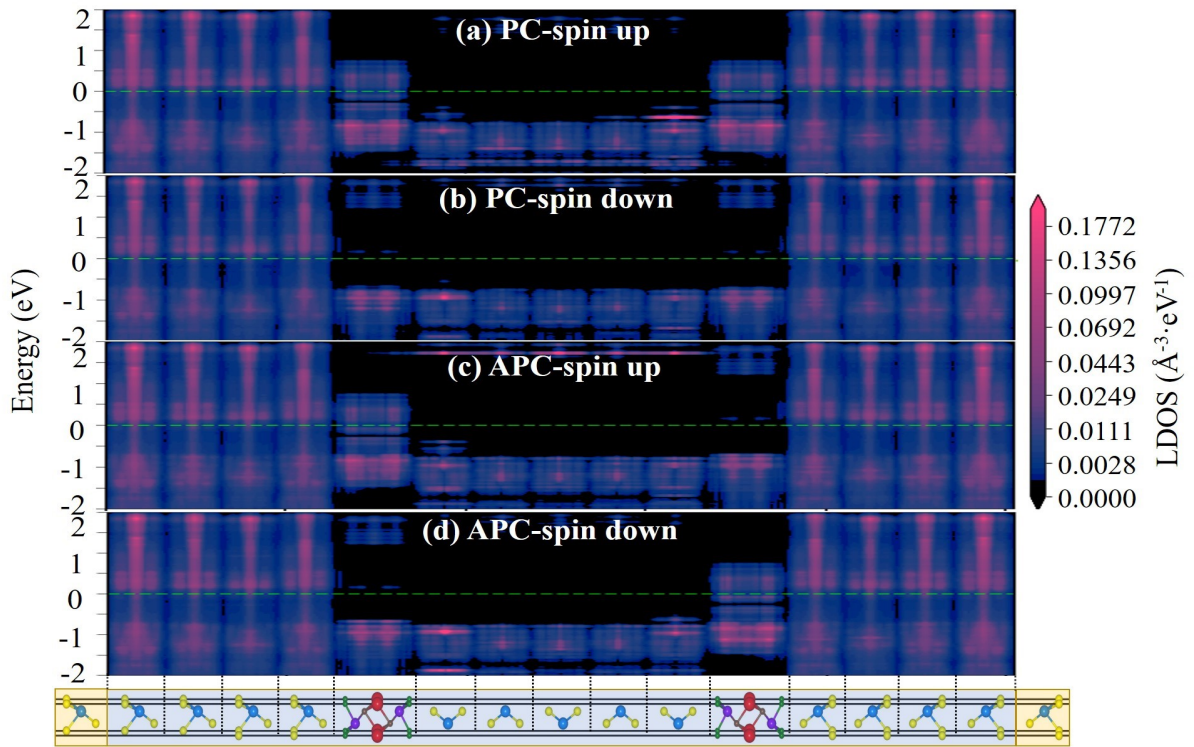

**Fig. S4** The spin-dependent projected local density of states of MTJ-5HM for (a) spin-up and (b) spin-down channel in PC state, (c) spin-up and (d) spin-down channel in APC state.

**Table S1** The calculated total spin-dependent conductances ( $e^2/h$ ) in PC state  $G_{\text{PC}}$  and APC state  $G_{\text{APC}}$ , and TMR ratios with and without spin-orbit coupling (SOC) for MTJ-HM, MTJ-3HM and MTJ-5HM devices.

| MTJs    | $G_{\text{PC}}$        | $G_{\text{APC}}$       | TMR (%)            | $G_{\text{PC}}^{\text{SOC}}$ | $G_{\text{PC}}^{\text{SOC}}$ | TMR <sup>SOC</sup> (%) |
|---------|------------------------|------------------------|--------------------|------------------------------|------------------------------|------------------------|
| MTJ-HM  | $1.19 \times 10^{-5}$  | $4.05 \times 10^{-10}$ | $2.95 \times 10^6$ | $5.93 \times 10^{-4}$        | $2.06 \times 10^{-6}$        | $2.87 \times 10^4$     |
| MTJ-3HM | $1.30 \times 10^{-8}$  | $1.86 \times 10^{-13}$ | $6.95 \times 10^6$ | $2.15 \times 10^{-7}$        | $5.45 \times 10^{-10}$       | $3.94 \times 10^4$     |
| MTJ-5HM | $5.51 \times 10^{-11}$ | $5.96 \times 10^{-15}$ | $9.24 \times 10^5$ | $3.68 \times 10^{-11}$       | $1.13 \times 10^{-13}$       | $3.26 \times 10^4$     |
